# Supplementary material for: Lower BCL11B expression is associated with adverse clinical outcome for patients with myelodysplastic syndrome
Source: PubMed Central journal article supplement (PMC8193904; doi:10.1186/s40364-021-00302-y), 2021-06-10

# GSE114922

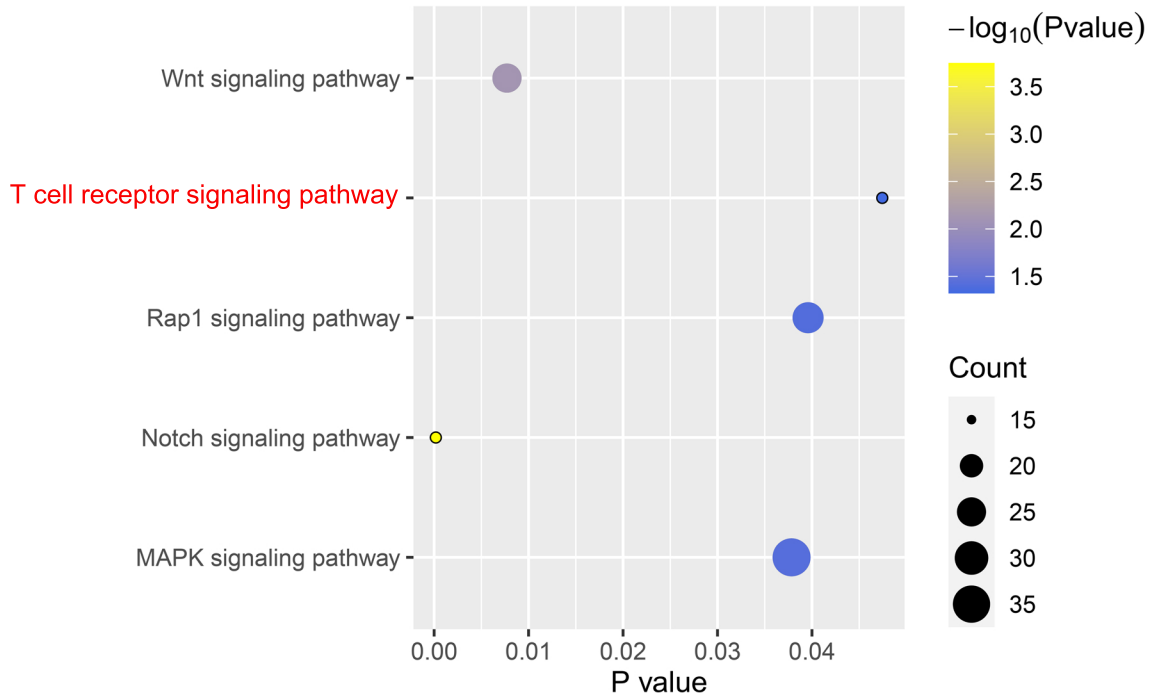

Supplement: 40364_2021_302_MOESM2_ESM.pdf [file 40364_2021_302_MOESM2_ESM.pdf]
